# Supplementary material
Source: PubMed Central journal article supplement (PMC6474755)
Supplement: NIHMS1520771-supplement-1.pdf [file NIHMS1520771-supplement-1.pdf]

## SUPPLEMENTARY INFORMATION

### Fragment-based screening of programmed death ligand 1 (PD-L1)

Evan Perry<sup>a</sup>, Jonathan J. Mills<sup>a</sup>, Bin Zhao<sup>a</sup>, Feng Wang<sup>a</sup>, Qi Sun<sup>a</sup>, Plamen P. Christov<sup>b</sup>, James C. Tarr<sup>a</sup>, Tyson A. Rietz<sup>a</sup>, Edward T. Olejniczak<sup>a</sup>, Taekyu Lee<sup>a</sup>, Stephen Fesik<sup>a\*</sup>

<sup>a</sup>Department of Biochemistry, Vanderbilt University, Nashville, Tennessee 37232-0146, USA

<sup>b</sup>Vanderbilt Institute of Chemical Biology Synthesis Core, Vanderbilt University, Nashville, Tennessee 37232-0146, USA

Email: [stephen.fesik@vanderbilt.edu](mailto:stephen.fesik@vanderbilt.edu)

Phone: 1-615-322-6303

Fax: 1-615-875-3236

### Supplementary Information

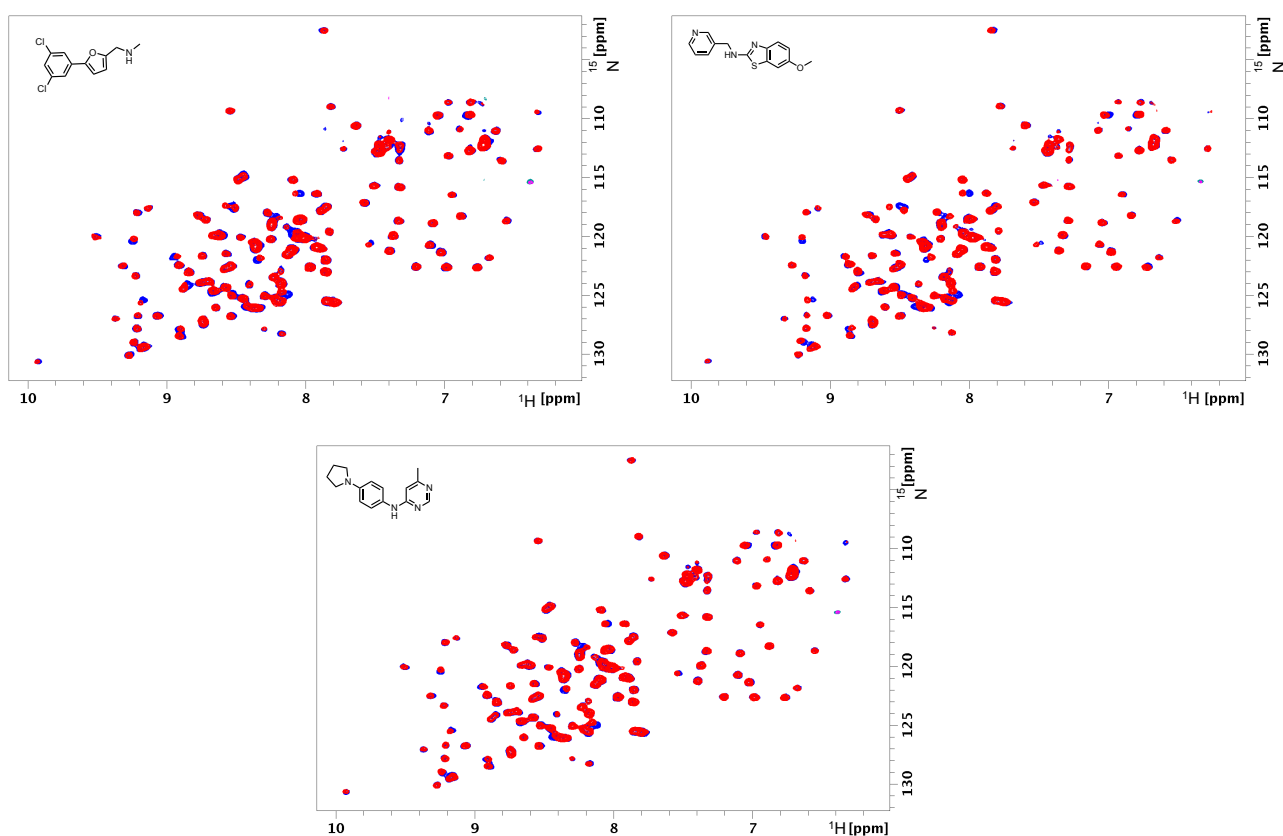

Supplementary Figure 1: SOFAST HMQC spectra PD-L1-6His-H140E in the absence (blue) and presence of 800  $\mu$ M fragment (red) for fragment 3 (top left), fragment 6 (top right) and fragment 7 (bottom).

Supplementary Table 1: X-ray statistics of PD-L1 crystal structures.

| Structure                   | IgV-6xHis-H140E     | Fragment 1                                                                        | Fragment 3                                                                        | Fragment 9                                                                         | BMS Small molecule                                                                  | BMS Macrocyclic Peptide                                                             |
|-----------------------------|---------------------|-----------------------------------------------------------------------------------|-----------------------------------------------------------------------------------|------------------------------------------------------------------------------------|-------------------------------------------------------------------------------------|-------------------------------------------------------------------------------------|
| Ligand                      | n/a                 |  |  |  |  |  |
| Parameter                   |                     |                                                                                   |                                                                                   |                                                                                    |                                                                                     |                                                                                     |
| PDB ID Code                 | 6NP9                | 6NM7                                                                              | 6NOJ                                                                              | 6NOS                                                                               | 6NM8                                                                                | 6NNV                                                                                |
| no. of chains               | 1                   | 2                                                                                 | 2                                                                                 | 2                                                                                  | 2                                                                                   | 4                                                                                   |
| Data collection             |                     |                                                                                   |                                                                                   |                                                                                    |                                                                                     |                                                                                     |
| space group                 | C2221               | P21212                                                                            | P21212                                                                            | P21212                                                                             | P21212                                                                              | P21                                                                                 |
| a,b,c (Å)                   | 53.33, 54.11, 85.72 | 82.91, 94.92, 32.15                                                               | 84.01, 97.40, 33.18                                                               | 83.80, 96.94, 32.65                                                                | 33.45, 54.60, 141.2                                                                 | 56.84, 61.68, 80.89                                                                 |
| α,β,γ (deg)                 | 90, 90, 90          | 90, 90, 90                                                                        | 90, 90, 90                                                                        | 90, 90, 90                                                                         | 90, 90, 90                                                                          | 90, 90, 17, 90                                                                      |
| resolution (Å)              | 40-1.27(1.29-1.27)  | 41.95 - 2.43 (2.47 - 2.43)                                                        | 40-2.7(2.75-2.7)                                                                  | 40-2.33(2.39-2.33)                                                                 | 20.26 - 2.79 (2.995 - 2.79)                                                         | 40-1.92(1.96-1.92)                                                                  |
| no. of unique reflections   | 32928(1604)         | 10155 (511)                                                                       | 7548(354)                                                                         | 16647(803)                                                                         | 6839 (332)                                                                          | 49872(2469)                                                                         |
| completeness (%)            | 99.6(99.8)          | 100 (100)                                                                         | 94.2(89.6)                                                                        | 99.9(99.8)                                                                         | 99.3 (100)                                                                          | 96.3(95.1)                                                                          |
| redundancy                  | 9.2(7.1)            | 7.7 (7.7)                                                                         | 4.1(2.6)                                                                          | 8.9(7.9)                                                                           | 11.7 (12.6)                                                                         | 3.6(2.5)                                                                            |
| Rsym                        | 0.05(0.28)          | 0.05 (0.021)                                                                      | 0.09(0.46)                                                                        | 0.08(0.5)                                                                          | 0.235 (0.03)                                                                        | 0.06(0.33)                                                                          |
| I/σ(I)                      | 61.3(7.2)           | 15.2 (2.16)                                                                       | 7.3(2.1)                                                                          | 11.3(2.6)                                                                          | 18.8 (4.0)                                                                          | 10.8(2.4)                                                                           |
| Structure Refinement        |                     |                                                                                   |                                                                                   |                                                                                    |                                                                                     |                                                                                     |
| no. of reflections test set | 2016                | 492                                                                               | 601                                                                               | 1190                                                                               | 345                                                                                 | 1677                                                                                |
| Rwork/Rfree                 | 20.16(21.83)        | 20.22 (26.86)                                                                     | 18.53(27.54)                                                                      | 19.00(24.54)                                                                       | 19.23 (31.31)                                                                       | 21.47(25.31)                                                                        |
| Ramachandran                |                     |                                                                                   |                                                                                   |                                                                                    |                                                                                     |                                                                                     |
| preferred regions (%)       | 99.15               | 93.15                                                                             | 92.31                                                                             | 95.14                                                                              | 93.93                                                                               | 94.41                                                                               |
| allowed regions (%)         | 0.85                | 6.05                                                                              | 7.29                                                                              | 4.86                                                                               | 6.07                                                                                | 4.97                                                                                |
| disallowed regions (%)      | 0.00                | 0.81                                                                              | 0.40                                                                              | 0.00                                                                               | 0                                                                                   | 0.62                                                                                |
| rms deviations              |                     |                                                                                   |                                                                                   |                                                                                    |                                                                                     |                                                                                     |
| bond length                 | 0.006               | 0.009                                                                             | 0.01                                                                              | 0.011                                                                              | 0.010                                                                               | 0.004                                                                               |
| bond angle                  | 0.895               | 0.967                                                                             | 1.45                                                                              | 1.259                                                                              | 1.391                                                                               | 1.046                                                                               |
| coordinate error            | 0.21                | 0.34                                                                              | 0.34                                                                              | 0.28                                                                               | 0.31                                                                                | 0.23                                                                                |

## Experimental

**Purification of PD-L1:** The IgV domain of human PD-L1 (residues 18 – 134) was codon optimized and cloned into the pET28b vector using *NcoI* and *NotI* restriction sites to include a C-terminal 6His tag (Genscript). The resulting vector was used to transform *E. coli* BL21 (DE3) GOLD cells (Stratagene). Unlabeled PD-L1 for X-ray crystallography was expressed in LB media. Uniformly <sup>15</sup>N labeled PD-L1 for NMR studies was expressed in M9 media containing <sup>15</sup>N ammonium chloride (Cambridge Isotope Laboratories) as the sole nitrogen source. Protein expression was induced for 5 hours at 37 °C following addition of 1 mM IPTG at OD = 0.8. Cell pellets were resuspended in lysis buffer (50 mM Tris-HCl pH = 8.5, 150 mM NaCl, 20 mM DTT, 2 mM EDTA and 1 mM PMSF) at 10 mL/g of cell pellet and lysed by homogenization at 4 °C (APV-2000, APV). Inclusion bodies were collected by centrifugation (10,000 x g for 20 minutes). Inclusion bodies were washed using a series of washes containing lysis buffer and 2% Triton X-100, 1% Triton X-100, 0.5% Triton X-100 and 1.5 M NaCl wash steps (5,000 x g for 10 minutes per wash). Purified inclusion bodies were solubilized at 2 mg/mL in denaturing buffer (50 mM Tris-HCl pH = 8.5, 250 mM, 6M Guanidine HCl) for 4 hours at room temperature. The solubilized inclusion bodies were filtered through a 0.45 μm filter and refolded dropwise into refolding buffer (100 mM Tris pH = 8, 1 M arginine, 2 mM EDTA, 0.25 mM oxidized glutathione and 0.25 mM glutathione) at 4 °C overnight.<sup>1</sup> The final protein concentration in the refolding buffer was 0.1 mg/mL. Refolded PD-L1 was dialyzed 3 times over 48 hours into dialysis buffer (10 mM Tris pH = 8, 20 mM NaCl). Buffer exchanged PD-L1 was concentrated using a stirred ultrafiltration cell with a 10 MWCO filter (Amicon, Millipore). Concentrated PD-L1 (0.5 - 1 mg/mL) was loaded to a size exclusion column (Superdex75 26/60) pre-equilibrated with NMR buffer (50 mM Sodium Phosphate pH = 7, 25 mM NaCl) using an AKTA purifier. Monomeric PD-L1 was pooled, concentrated to 1 mg/mL (60 μM), aliquoted and flash frozen using liquid nitrogen. All protein was stored at -80° C until needed for experiments.

*NMR Spectroscopy:* NMR screening was performed at 30° C using a Bruker Avance III 600 MHz spectrometer equipped with a 5 mm single-axis z-gradient cryoprobe and Bruker SampleJet sample changer. Screening samples (500 µL) contained 35 µM (0.5 mg/mL) of <sup>15</sup>N PD-L1 IgV-6His-H140E and fragment mixtures containing 400 µM of each fragment and 5% DMSO-*d*<sub>6</sub>. <sup>1</sup>H, <sup>15</sup>N SOFAST-HMQC spectra were obtained using 26 scans (12 minutes) and analyzed using Topspin (Bruker BioSpin).<sup>2</sup> Deconvolution of hit mixtures were performed as a single fragment at 800 µM concentration. NMR titration experiments were performed by monitoring the change in <sup>1</sup>H and <sup>15</sup>N chemical shifts of 6-point 2-fold serial dilutions (3 mM, 1.5 mM, 0.75 mM, 0.375 mM, 0.188 mM, 0.093 mM). K<sub>d</sub> measurements were calculated by fitting using an in-house script.<sup>3</sup> Signal intensity of ligand peaks in 1D-<sup>1</sup>H NMR spectra (zgesgp) of each sample prior to HMQC acquisition was used to monitor ligand solubility. Data points with poor ligand solubility were excluded from analysis.

*Antagonist induced dissociation assay (AIDA):* PD-1 reference sample contained 20 µM <sup>15</sup>N labeled PD-1 in NMR buffer (50 mM NaPO<sub>4</sub>, 25 mM NaCl, 4% d<sub>6</sub>-DMSO). PD-1 / PD-L1 reference sample contained 20 µM <sup>15</sup>N labeled PD-1 and 23 µM PD-L1 IgV-IgC in NMR buffer. Test samples contained 20 µM <sup>15</sup>N labeled PD-1, 23 µM PD-L1 IgV-IgC and 800 µM fragment in NMR buffer. <sup>1</sup>H, <sup>15</sup>N SOFAST-HMQC spectra were obtained of all samples. Qualitative displacement scores were assigned by overlaying the HMQC spectra of test samples to the broadened PD-1 / PD-L1 samples. Gly90 was used to assess the rescued signal intensity. Higher amounts rescued signal intensity of G90 (> 15%) was assigned a score of 2 while weaker rescued signal intensity (1% to 15%) was assigned a score of 1. No rescued signal intensity was assigned a score of 0.

*X-ray Crystallography:* Unlabeled IgV PD-L1 in X-ray buffer (10 mM Tris pH 8, 20 mM NaCl) was concentrated to 3 – 5 mg/mL (200 – 345 µM) and centrifuged at 13,000 rpm for 5 minutes to remove precipitation. The Hampton Index HT screen was used to test 96 diverse conditions for crystallization. Ligand free crystals of PD-L1 IgV-6His-H140E were obtained in conditions containing 100 mM HEPES pH 7.5 and 2M ammonium sulfate overnight at 18 °C. Fragment bound crystals were generated by incubating PD-L1 IgV-6his-V76T at 35 µM (0.5 mg/mL) with 2 – 4 mM of fragment on ice for 3 hours in X-ray buffer. Precipitated fragment was removed by centrifugation (13,000 rpm for 5 minutes). The complex was concentrated to 200 µM (3 mg/mL) using 3 kDa MWCO amicon ultra- 0.5 mL centrifugal filters (Millipore). Crystals of the all fragment / PD-L1 complexes were formed in conditions containing 0.02 - 0.1 M NaH<sub>2</sub>PO<sub>4</sub>, 1.0 – 2.0 M K<sub>2</sub>HPO<sub>4</sub> within 48 hours at 18 °C. Crystals of the PD-L1 BMS small molecule inhibitor were obtained by incubated 35 µM PD-L1 IgV-6his-V76T and 1 mM BMS inhibitor on ice for 3 hours. The complex was concentrated to 350 µM (5 mg/mL) before plating. Crystals were obtained in conditions containing 29% PEG<sub>4000</sub>, 0.28 M NaCl, 0.01 M Tris pH = 8.5 within 48 hours at 18 °C. The macrocyclic peptide was incubated with 35 µM PD-L1 IgV-6his-V76T, H140E and 200µM peptide. The complex was concentrated to 200 µM (3 mg/mL) and screened against the Hampton Index HT screen. Crystals of the PD-L1 macrocyclic peptide was obtained in 3.5 M NaFormate within 48 hours at 18 °C.

All crystals were cryoprotected in mother liquor containing 20% glycerol prior to freezing in liquid nitrogen. Data were collected on the Life Sciences Collaborative Access Team (LS-CAT) beamlines at the Advanced Photon Source (APS), Argonne National Laboratory. Indexing, integration, and scaling were performed with HKL2000. The phases were determined by molecular replacement (Phaser-MR) using the PD-L1 IgV-6His construct (PDB code 5C35). Refinement of the models were done using phenix.refine and manual fitting the model to electron density using COOT.<sup>4,5</sup> All figures were generated using PyMOL.<sup>6</sup>

**Author Present Addresses**

F.W.: Novartis Institutes for Biomedical Research, Emeryville, CA 94608, United States

Q.S.4: AbbVie, North Chicago, IL 60085, United States

**Supplementary References:**

[1] Zak, K. M., Kitel, R., Przetocka, S., Golik, P., Guzik, K., Musielak, B., Dömling, A., Dubin, G., and Holak, T. A. (2015) Structure of the Complex of Human Programmed Death 1, PD-1, and Its Ligand PD-L1, *Structure* 23, 2341-2348.

[2] Schanda, P., and Brutscher, B. (2005) Very fast two-dimensional NMR spectroscopy for real-time investigation of dynamic events in proteins on the time scale of seconds, *J Am Chem Soc* 127, 8014-8015.

[3] Williamson, M. P. (2013) Using chemical shift perturbation to characterise ligand binding, *Prog Nucl Magn Reson Spectrosc* 73, 1-16.

[4] Adams, P. D., Grosse-Kunstleve, R. W., Hung, L. W., Ioerger, T. R., McCoy, A. J., Moriarty, N. W., Read, R. J., Sacchettini, J. C., Sauter, N. K., and Terwilliger, T. C. (2002) PHENIX: building new software for automated crystallographic structure determination, *Acta Crystallogr D Biol Crystallogr* 58, 1948-1954.

[5] Emsley, P., and Cowtan, K. (2004) Coot: model-building tools for molecular graphics, *Acta Crystallogr D Biol Crystallogr* 60, 2126-2132.

[6] The PyMOL Molecular Graphics System, Version 2.0 Schrödinger, LLC
